# Supplementary material
Source: Springer Nature journal article supplement (https://www.springermedizin.de/resource/supplementary/13014_2009_223_MOESM3_ESM.pdf/9633210)

DVH Bladder

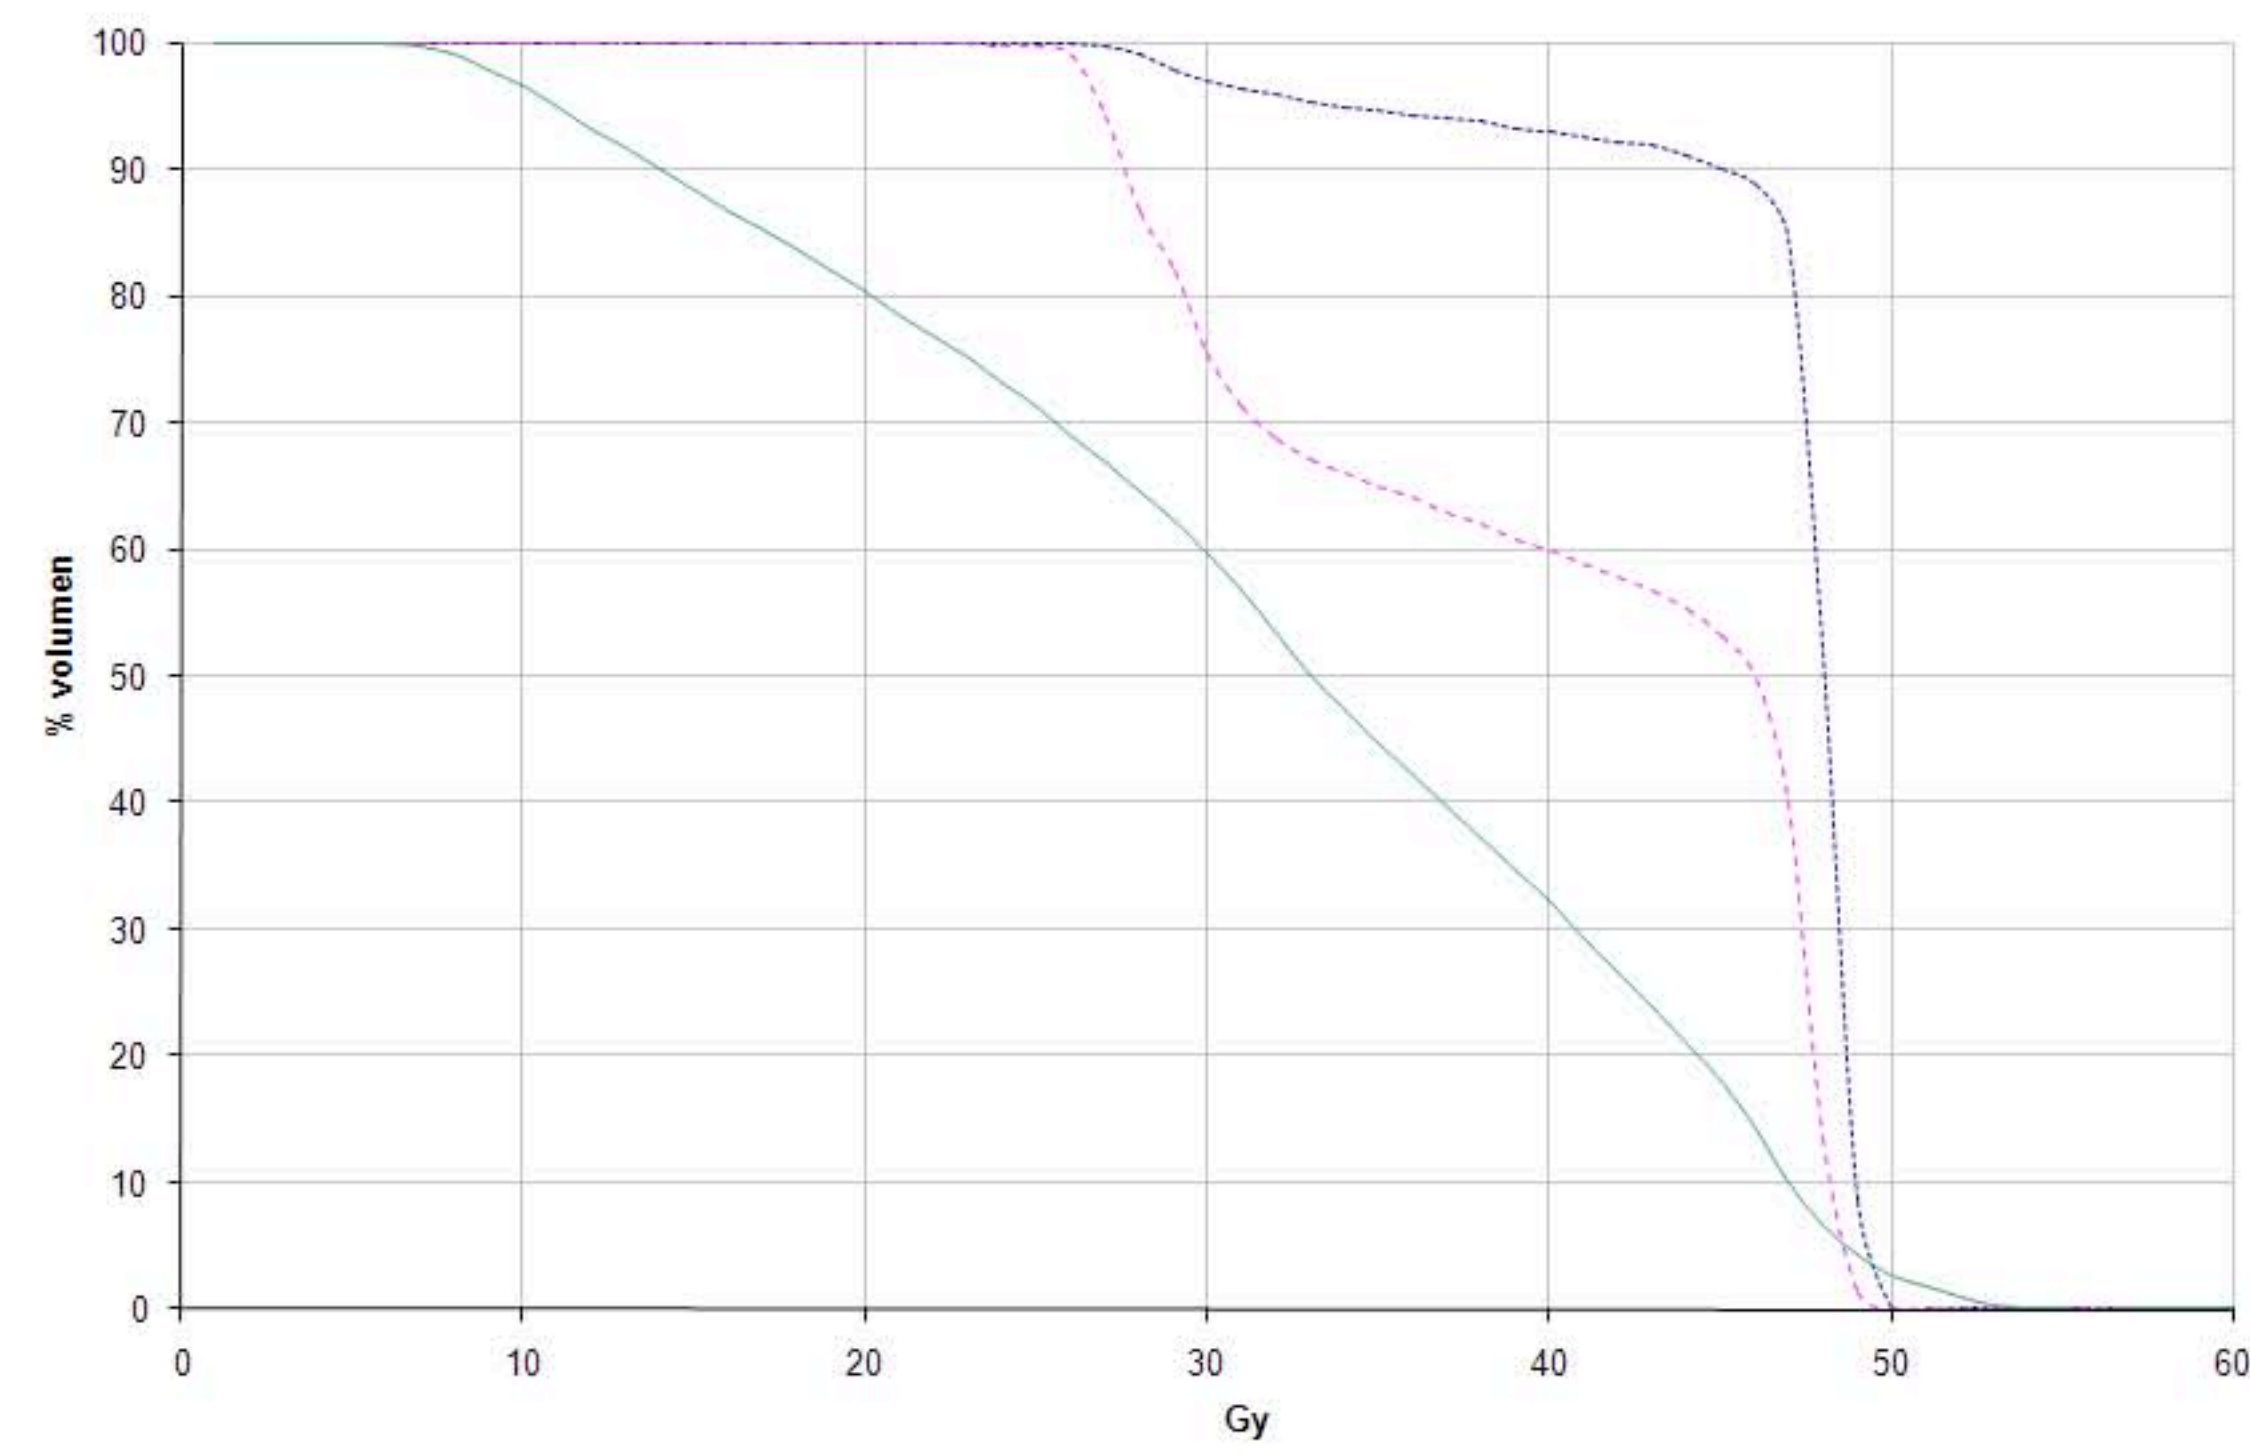

DVH Rectum

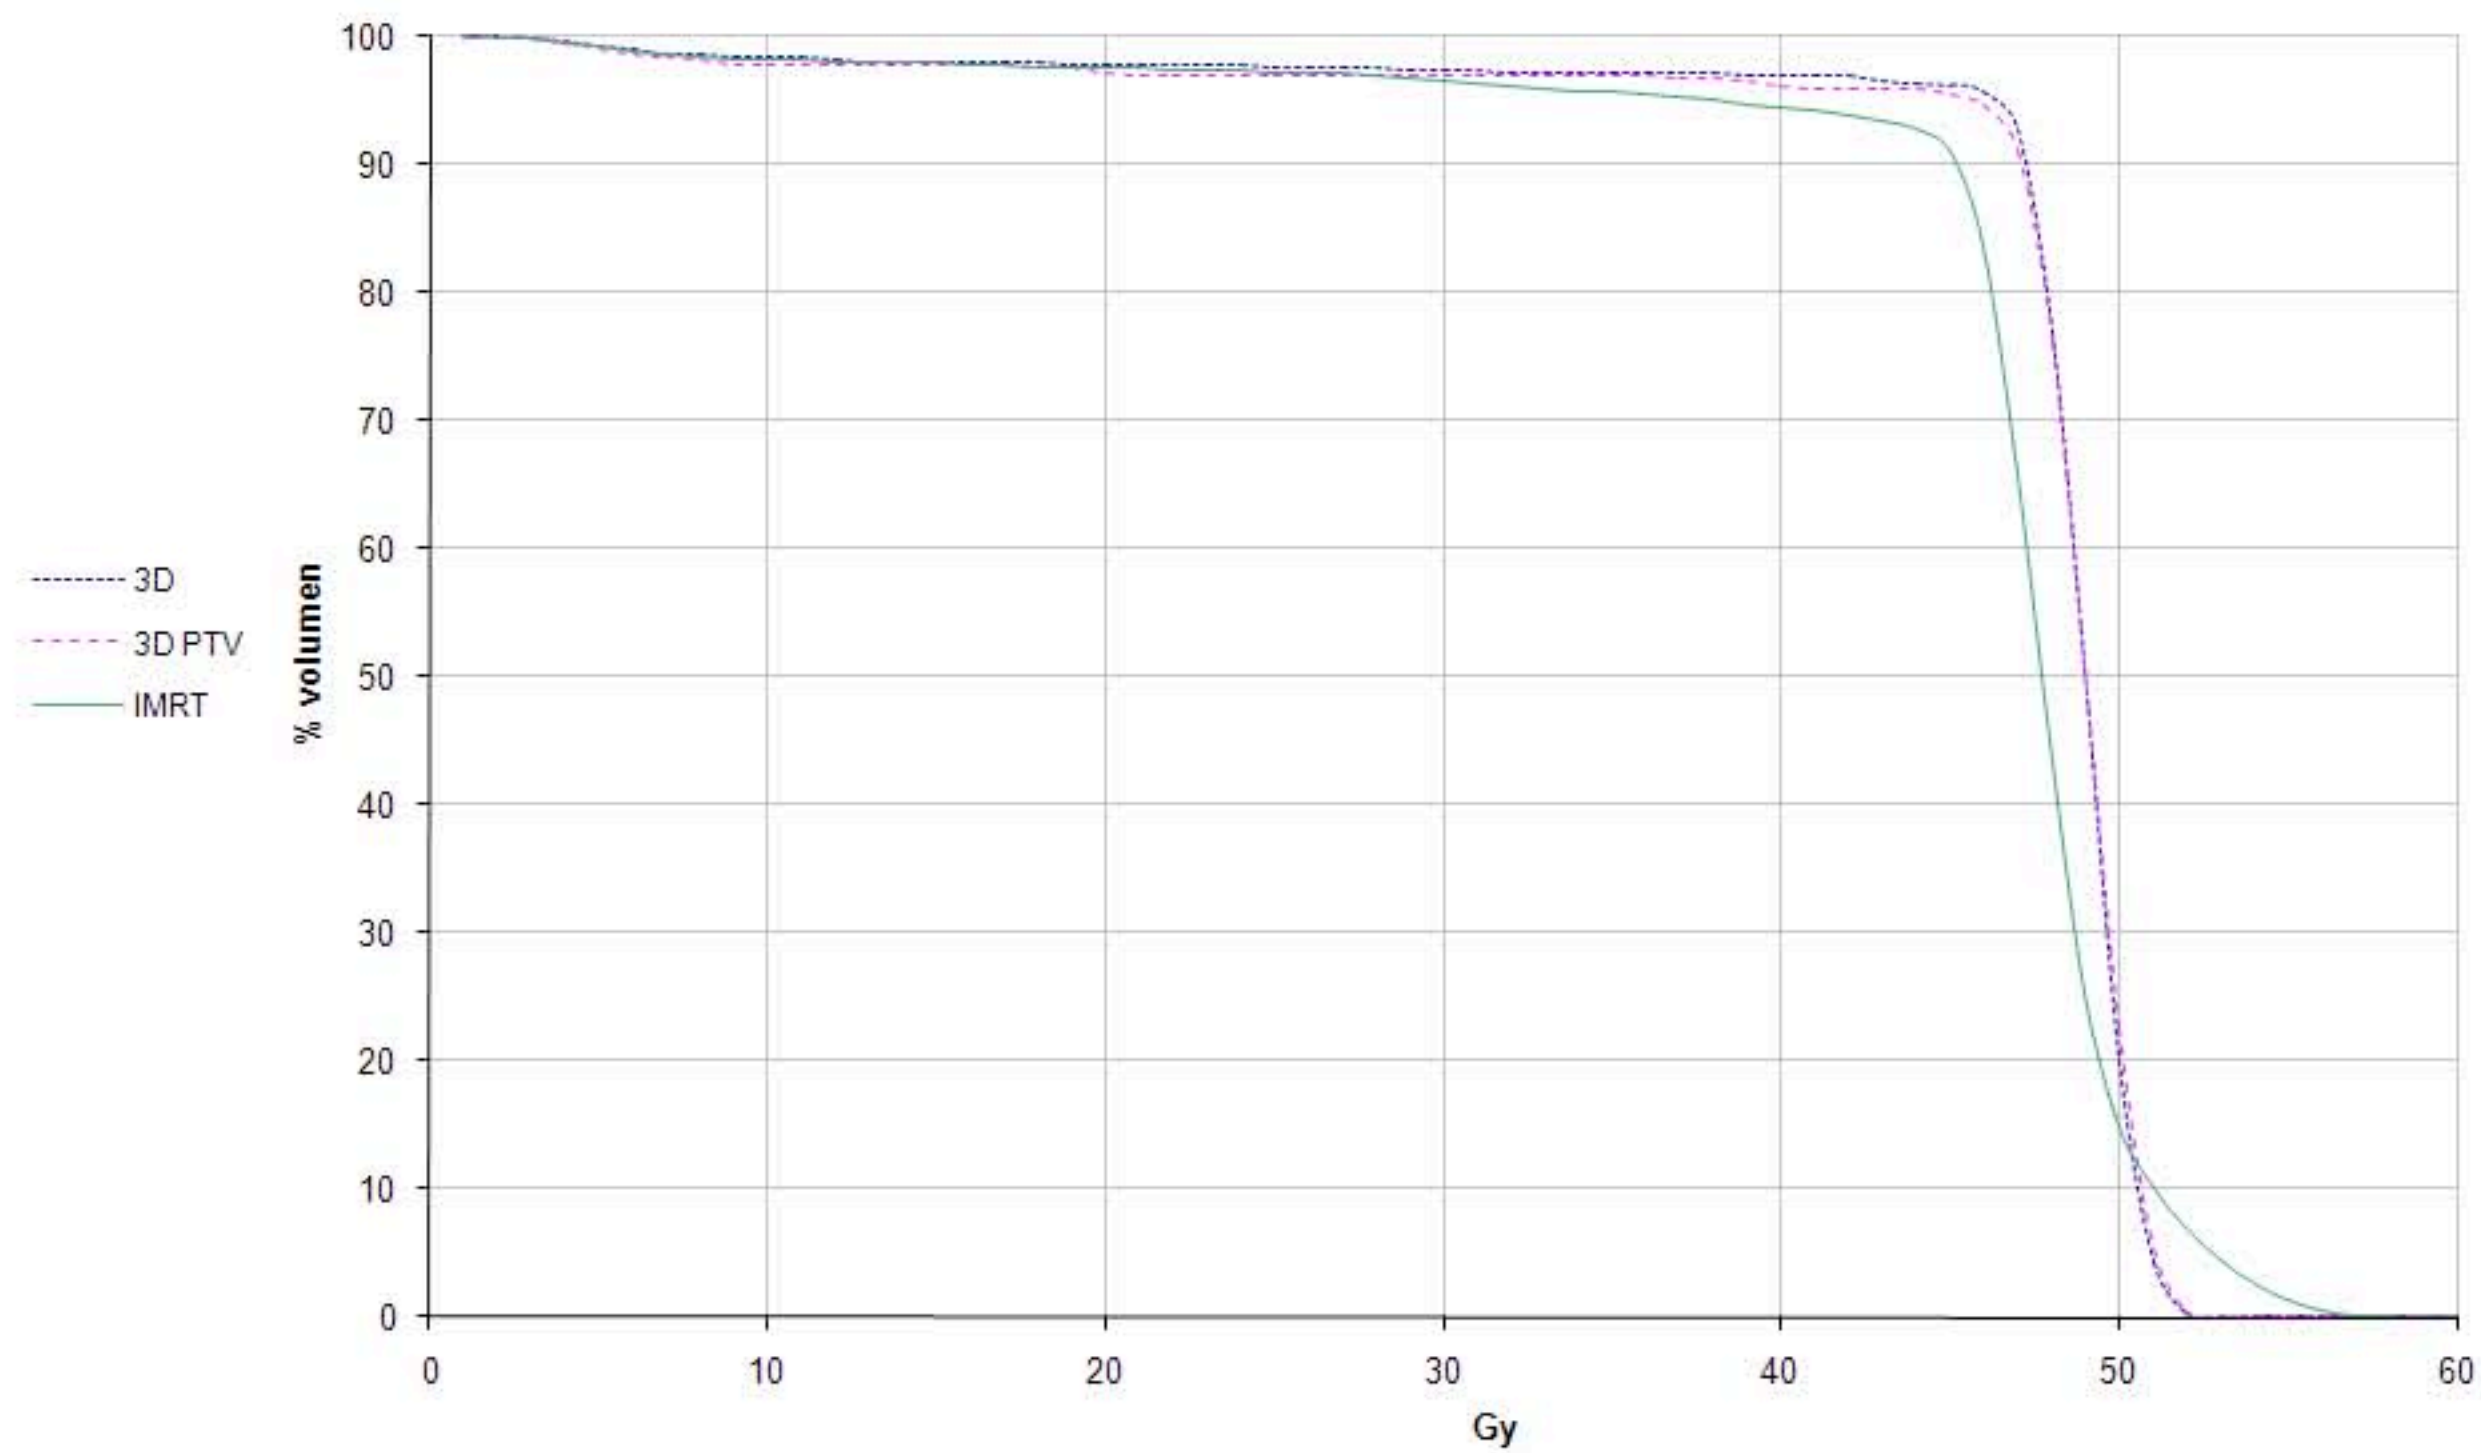

DVH Small Bowel

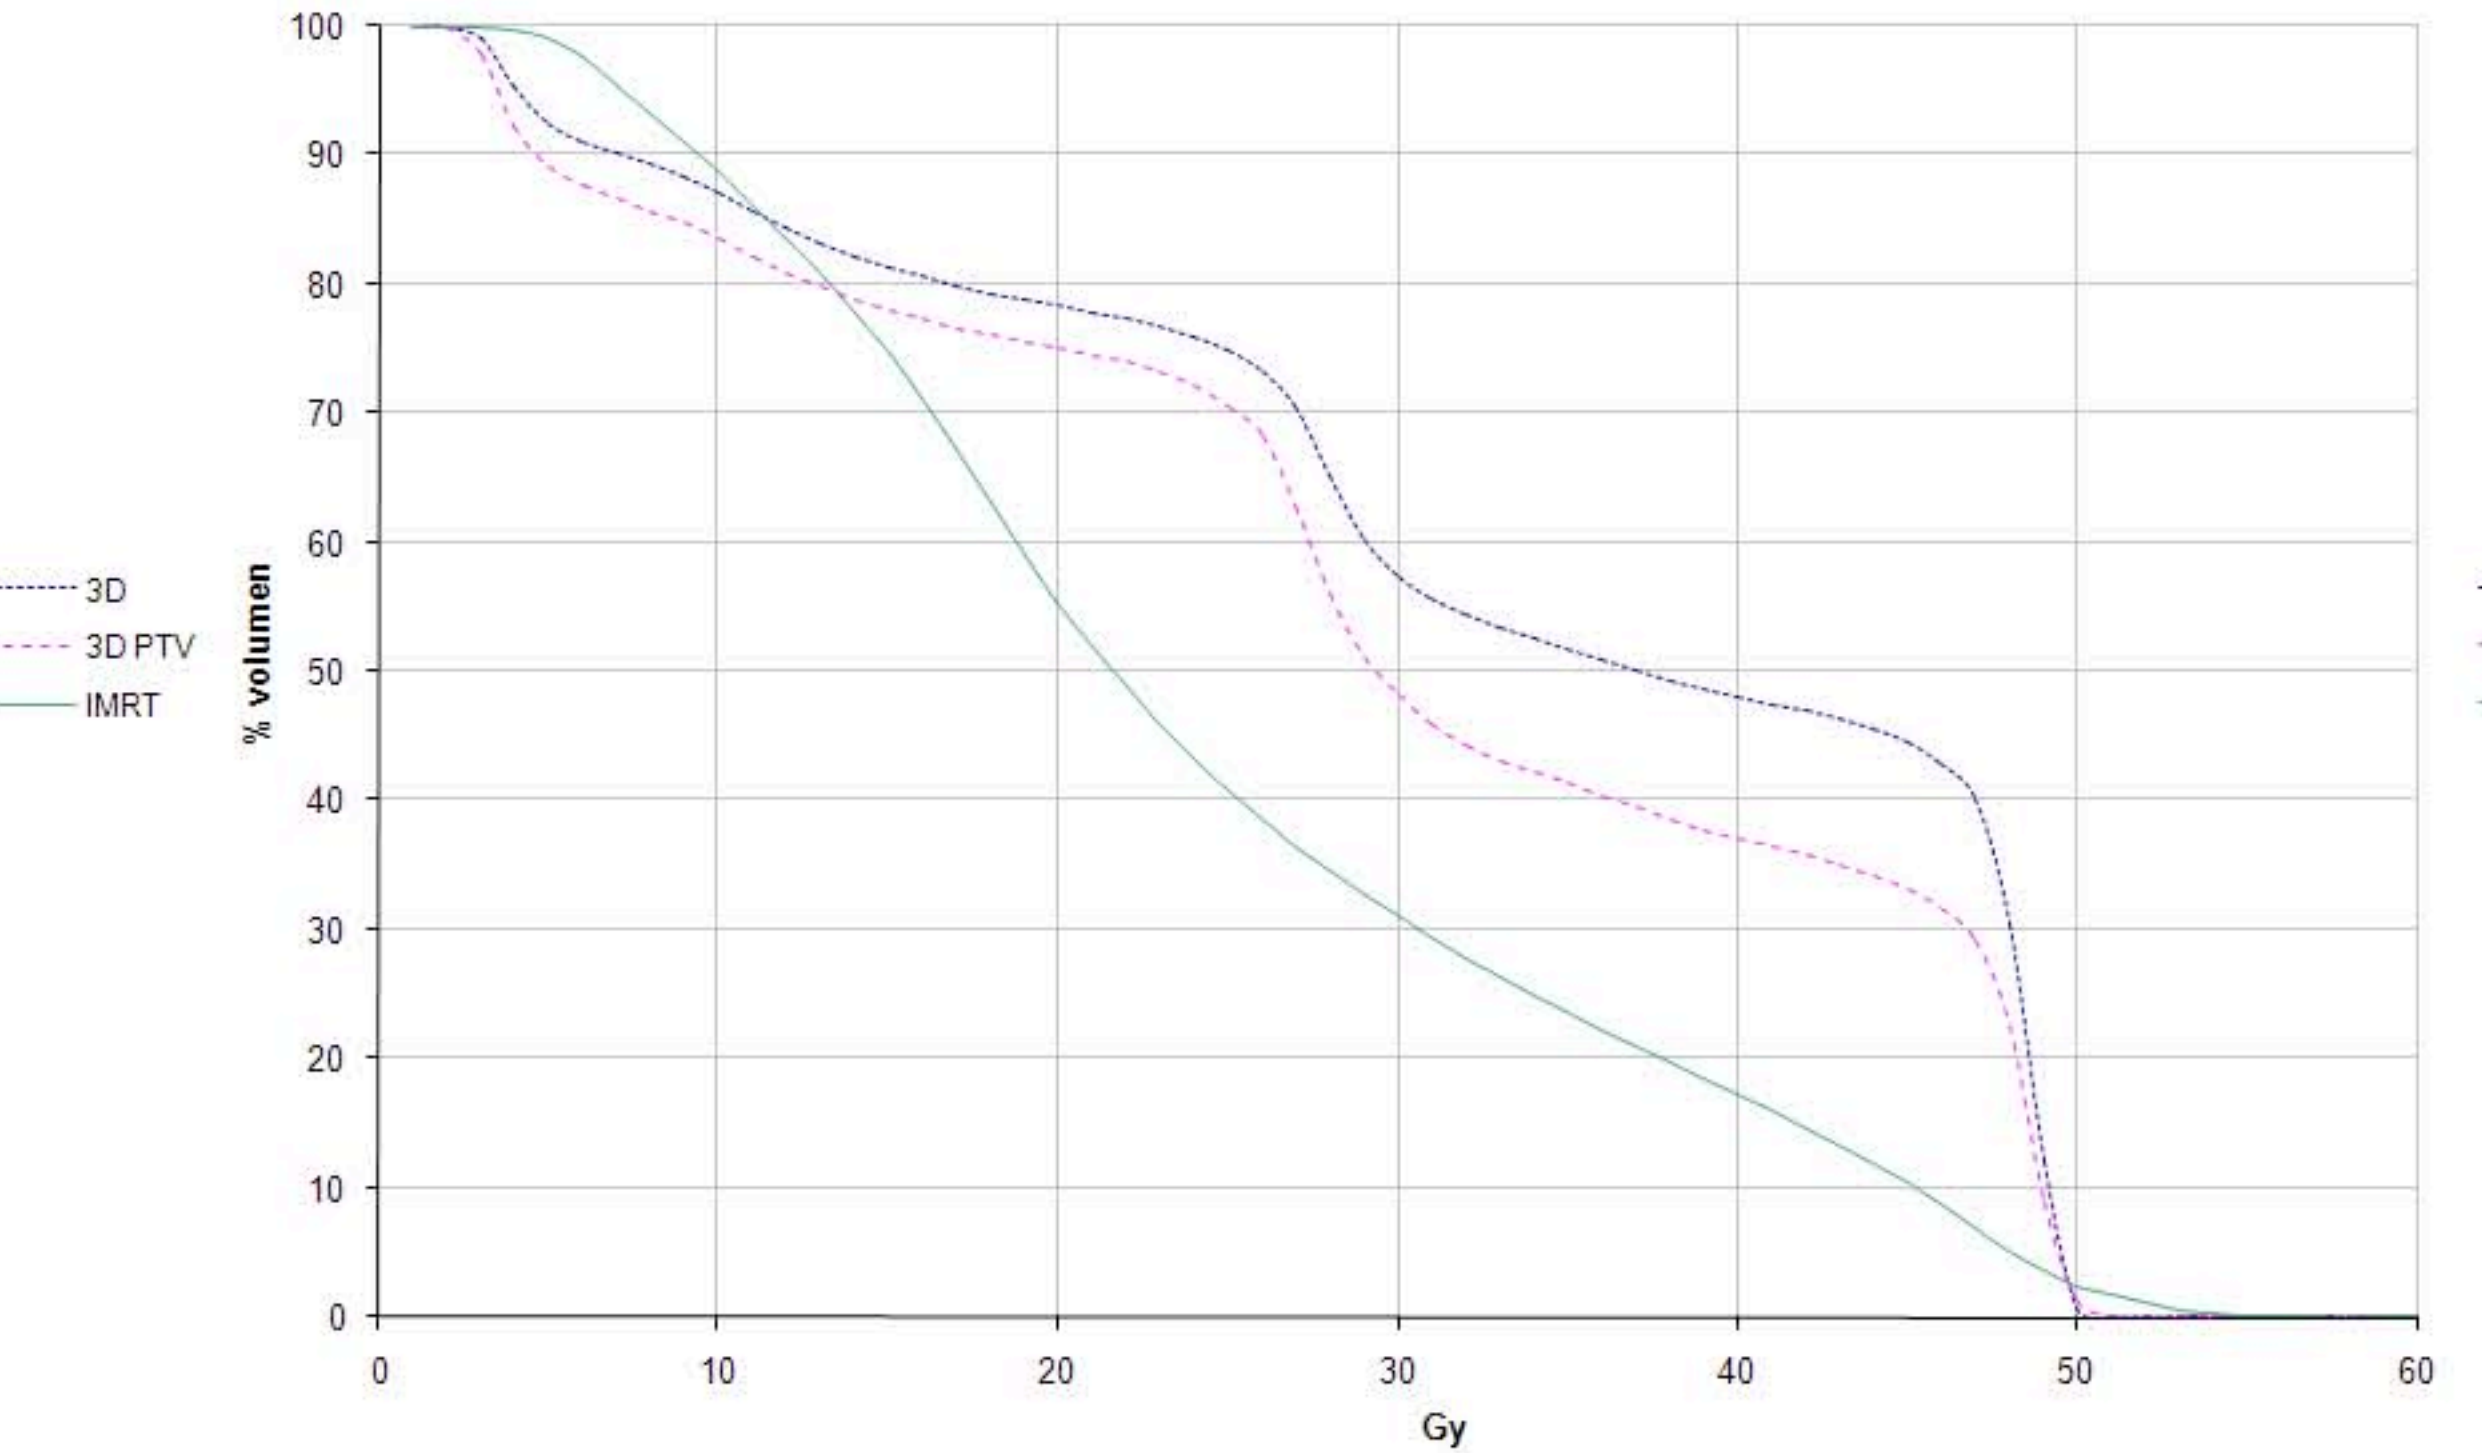

Supplement: MOESM3 [file 9633210]
